# Supplementary material for: A burst of genetic innovation in actin-related proteins (Arps) for testis-specific function in a Drosophila lineage
Source: bioRxiv or medRxiv preprint supplement (doi:10.1101/665299), 2019-06-10

**Supplemental Figure S1: Sequenced *Drosophila* species encode canonical Arps and lineage-specific Arps.**

**A**

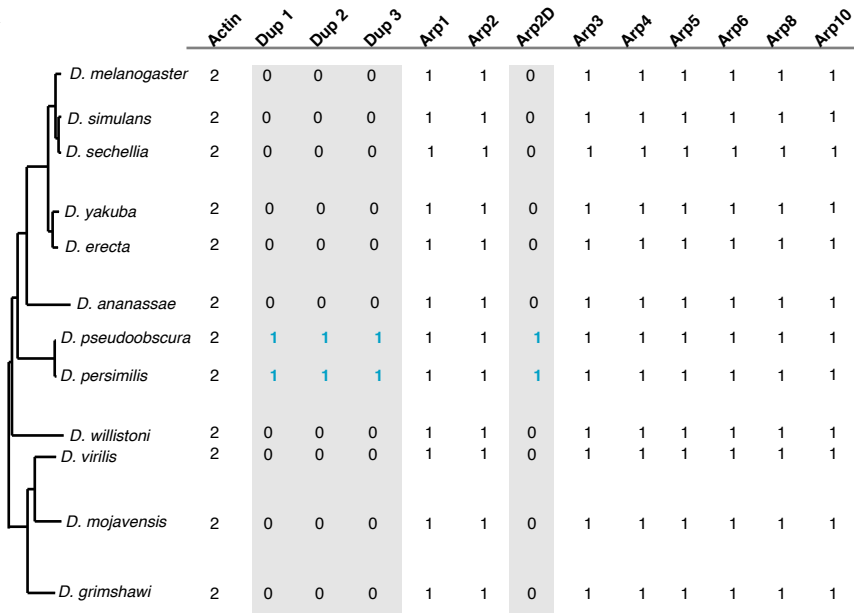

**B**

|              | Gene   | Chromosomal location |               |
|--------------|--------|----------------------|---------------|
|              |        | <i>D. mel</i>        | <i>D. pse</i> |
| Actin        | Act5C  | X                    | XL_group1e    |
|              | Act42A | 2R                   | 3             |
|              | Act57B | 2R                   | 3             |
| Muscle Actin | Act87E | 3R                   | 2             |
|              | Act88F | 3R                   | 2             |
|              | Act79B | 3L                   | XR_grp8       |
| Duplicates   | Arp2   | X                    | XL_grp1e      |
|              | Dup 1  | NA                   | 4_grp4        |
|              | Dup 2  | NA                   | 4_grp3        |
|              | Dup 3  | NA                   | XL_grp1a      |
|              | Arp2D  | NA                   | 4_grp3        |

**C**

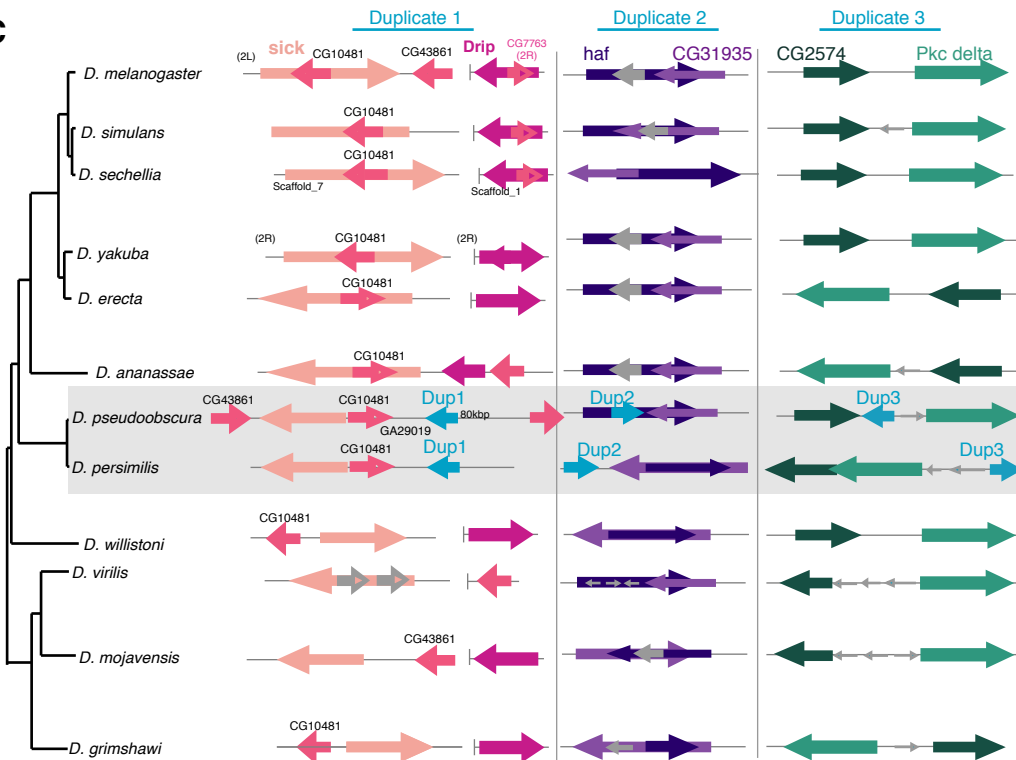

**Supplemental Figure S2: Arp2D is present in only the obscure clade.**

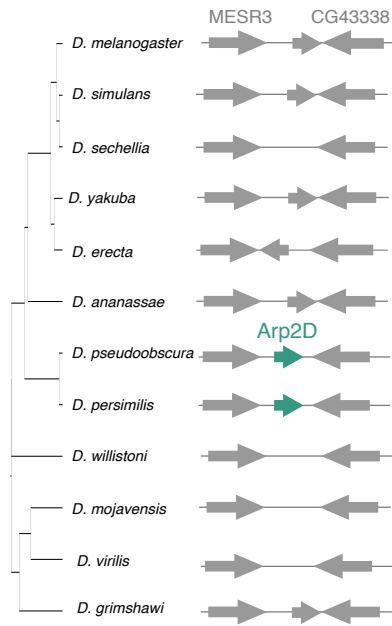

**Supplemental Figure S3: Nucleotide trees including pseudogenized genes recapitulate overall species tree topology**

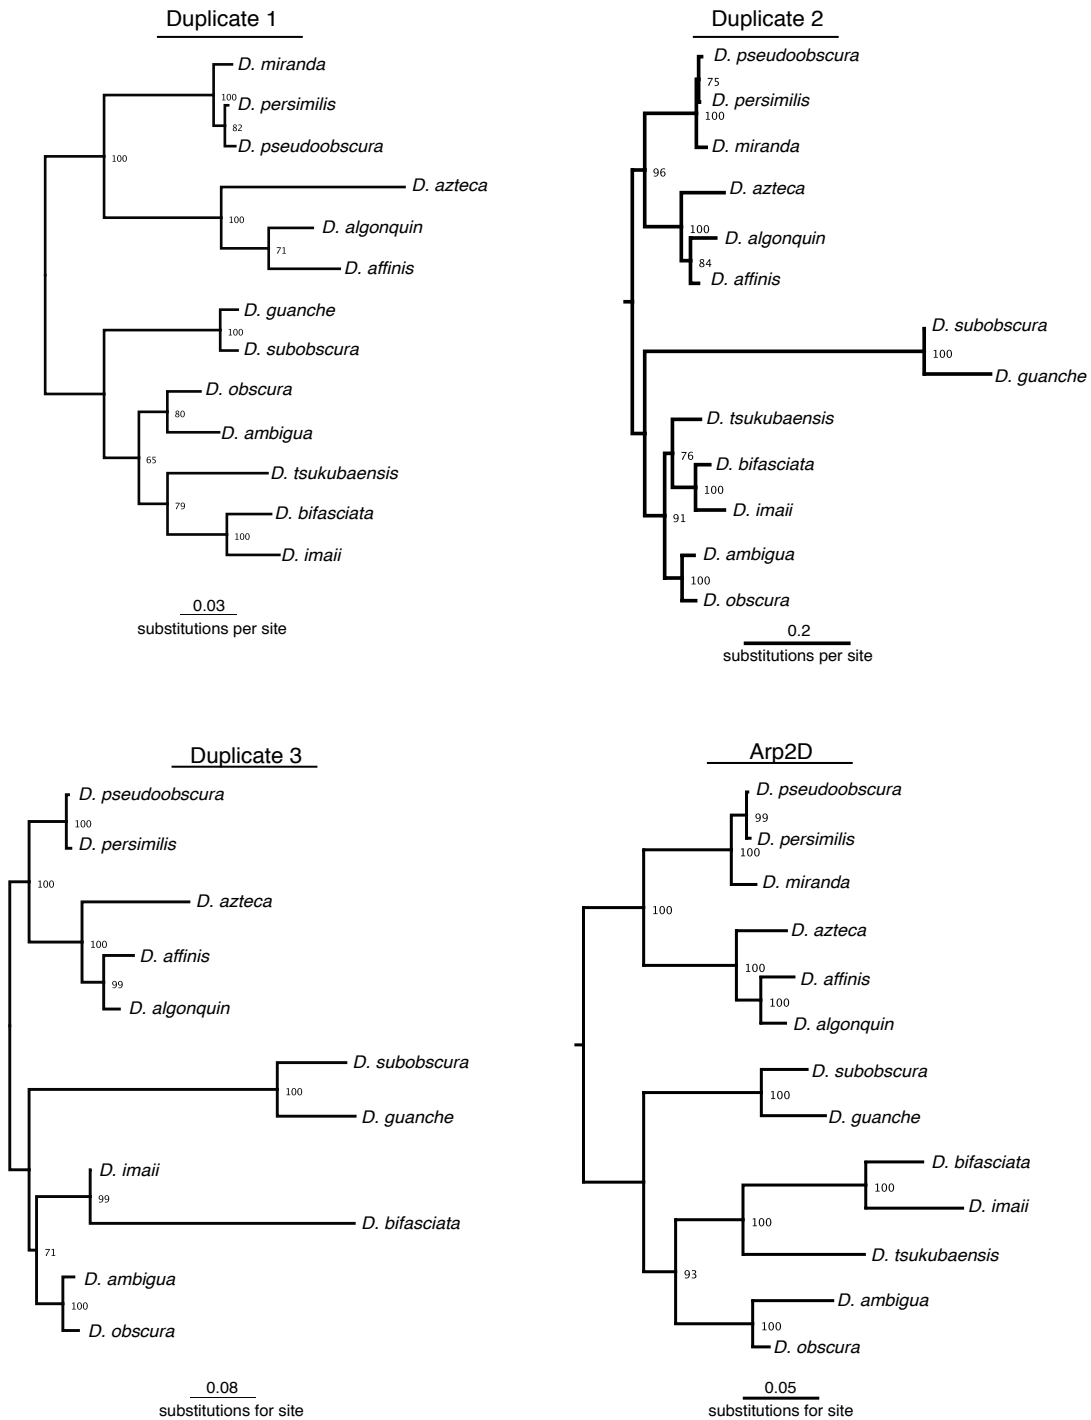

## Supplemental Figure S4: A single base-pair deletion leads to pseudogenization of Arp2D in *D. subobscura*

*D. pseu. Arp2D* ATGGATACCAAGGGTCGGCACATAATTTGTGTGATAATGGCACAGGATCTGTAAGTGGGACTTCCGGCAGCAATTTGCCCGGCACATCTTCCCTCGATAGTGGGGCTCCTATTCTC  
*D. subobs. Arp2D* M D T K G R H I I V C D N G T G S V K C G L A G S N L P A H I F P S I V G R P I L  
 130 140 150 160 170 180 190 200 210 220 230 240  
*D. pseu. Arp2D* CGGGCGATGAATCTTGCATGCGAATGGCGTGCAGATGGATGATGTGATGGTGGCGATGAGGCACCTCAAGCTGCGGCTATTGCTAGCGGTTCCCATCCCATGGAGAATGGTATAATCCGT  
*D. subobs. Arp2D* R A M N T C D A N G V Q M D D V M V G D E A L K L R S L L A V S H P M E N G I I R  
 250 260 270 280 290 300 310 320 330 340 350 360  
*D. pseu. Arp2D* AACTGGGAGGACATGTGCCATGTGGACTATACATTTGGCCCAAGAAGATGAACATCGAACCGCAACTCGAAGATACTGCTGCCGAGCCGCCAATGATCCCCACGAGGTATCGGGAG  
*D. subobs. Arp2D* AACTGGGAGGACATGTGCCAGTCCGGACTACATTTGGCCCAAGAAGTGGCCATTGAGCCGCAAAAATCAAAGATACTGCTGCCGAGGTGCCCAATGATGGTGGCAAAAGATCGGGAG  
 370 380 390 400 410 420 430 440 450 460 470 480 490  
*D. pseu. Arp2D* AAGATGATGGAGGTGATGTTGAGCATTACGGCTTTGATGCCACTGTTGGCCCTACAGGGCGGTGCTACGCTGTACGGCCAGGGTGTACTAGGGCGCGGTGATCGATCCCGGGATGGT  
*D. subobs. Arp2D* X M W E V M F E H Y G F D A T Y L A S Q A V L T L Y G Q G L T T G A V I D A G D G  
 500 510 520 530 540 550 560 570 580 590 600 610  
*D. pseu. Arp2D* GTCAAGAACATTTGCTGCTACGAGGAGGCTGCCCTGCCACATTTGACGAAGCATTGAATGTTTGGCCCGTGTATACACGGCGCTGGTCAAGTTGCTTATGCAACGGCGGTACCGG  
*D. subobs. Arp2D* ATGAGGCACATTTGCTCGTCTACGAGGAGGCTGCACCTGCCACATTTGACGAAGCATTGAATGTTTGGCCCGTGTATACACGGCGCTGGTCAAGTTGCTTATGCAACGGCGGTACCGG  
 620 630 640 650 660 670 680 690 700 710 720 730  
*D. pseu. Arp2D* TTGAATAATTCGGCGGACTTTGAAACGGTGCAGTGTGATGAGGAAAACCTGCTACGTTGGCTACGACATCGAGCAGGAGAAACGGCTGGCCGAGGACACACGACATGGTGGAGTCTAT  
*D. subobs. Arp2D* L N S A D F E T V R L M K E K L C Y V G Y D I E Q E K R L A E D T T A L V E S Y  
 740 750 760 770 780 790 800 810 820 830 840 850 860  
*D. pseu. Arp2D* ACGTTGCCGATGGTGCAGTGTCAAGATCGGGCGGAGCGTTCGAGGCGCCGAGGCTTCTTCAACCAGCATTTGATCGATGTGAGGCGCGCGGCTTCTGAAATGGCCTTCAATGTG  
*D. subobs. Arp2D* T L P D G R V I K I G G E R F E A P E A F F Q P H L I D V E A A G L S E M A F N V  
 870 880 890 900 910 920 930 940 950 960 970 980  
*D. pseu. Arp2D* ATTCAAGTCGGGACATCGACATACGTCGCGAGCTTCCGGCATACTGTTGTTGTTGGGGATCCACATGTTTCCGGGATTTCACGTCGACTGGAGAACGACTTGAAGAAATTTGTTCTTA  
*D. subobs. Arp2D* I Q A A D I D I R P Q L F R H I V L S G G S T M F P G F P S R L E N D L K K L F L  
 990 1,000 1,010 1,020 1,030 1,040 1,050 1,060 1,070 1,080 1,090 1,100  
*D. pseu. Arp2D* GAGCGAGTGTCCAACCGGATCGCGAAAATATGCCAAATTTAAGATACGAATTAAGGATCCACCACACGCAAGAAATATGCTTCTCAATGGTGGCTTGTTCGGCAATTCACATAAGGAT  
*D. subobs. Arp2D* E R V L Q R D A E N M P K F K I R I K D P P T R K N N V F N G G S V L A N V T K D  
 1,110 1,120 1,130 1,140 1,150 1,160 1,170 1,180 1,190 1,200 1,210 1,221  
*D. pseu. Arp2D* CGTGATGACTTTTGGATGCTCAAAGAGGAGTACGAGGAGCAGGGTCTTAAAGTGTGGACAGCTTAAAGCAGAAATCCAAAAGAGGAGAAATATGAAACAGATGAGGGGTAG  
*D. subobs. Arp2D* R D D F W M S K E E Y E Q G L K V L D K L K Q K S K K K E Y E T D E G \*  
 CGGGAGAGTTTGGATGTCAAAGAGGAGTACGAGGAGCAGGGCTCAAAGTGTGGACAGCTTAAAGCAGAAATCCAAAAGAGGAGAACTAAGCTGGAT-----TGA  
 G R S F G C P K R S T R S R A S K C W T S \* K R V L P R R R K L S W I-----

# Supplemental Figure S5: *D. miranda* encodes full-length Dup2 and Arp2D.

## A

### Dup2

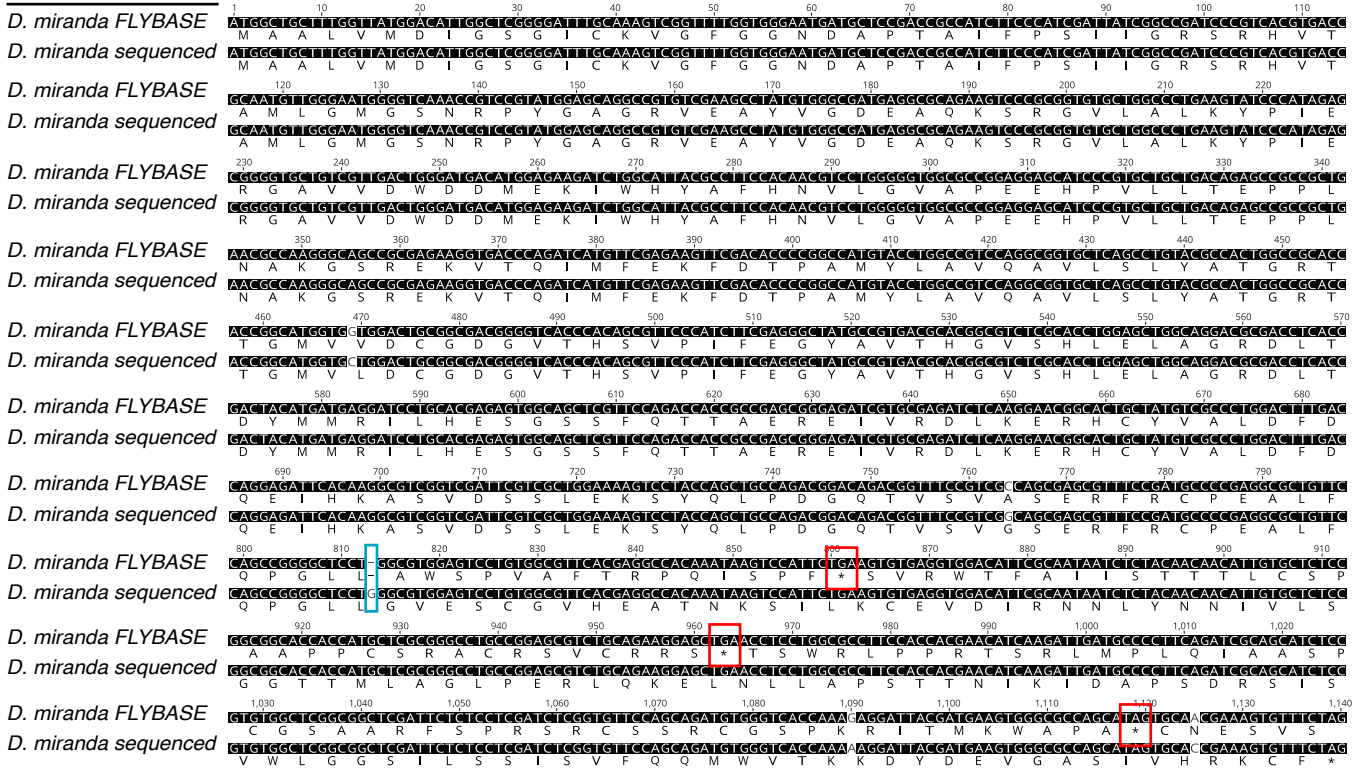

## B

### Arp2D

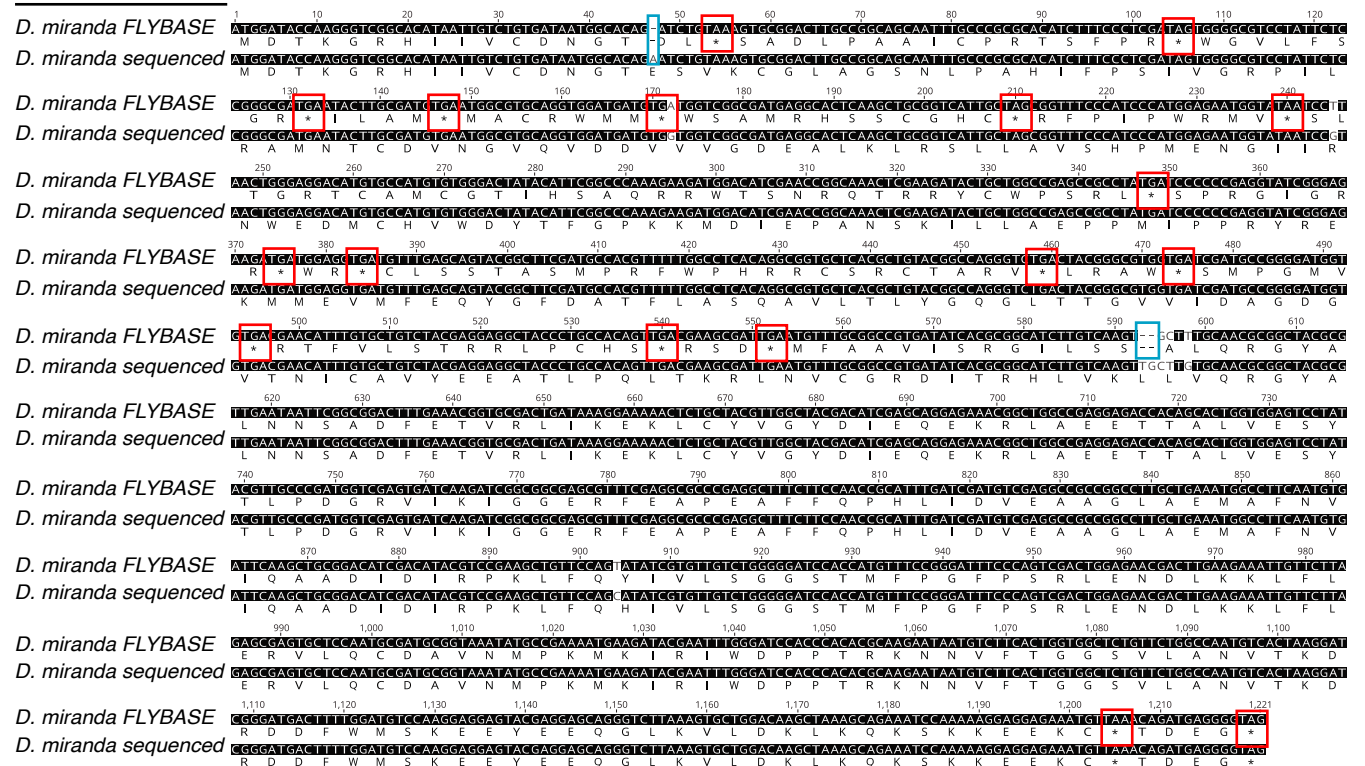

**Supplementary Figure S6: Gene and protein trees of Duplicates 1-3 and canonical Arps**

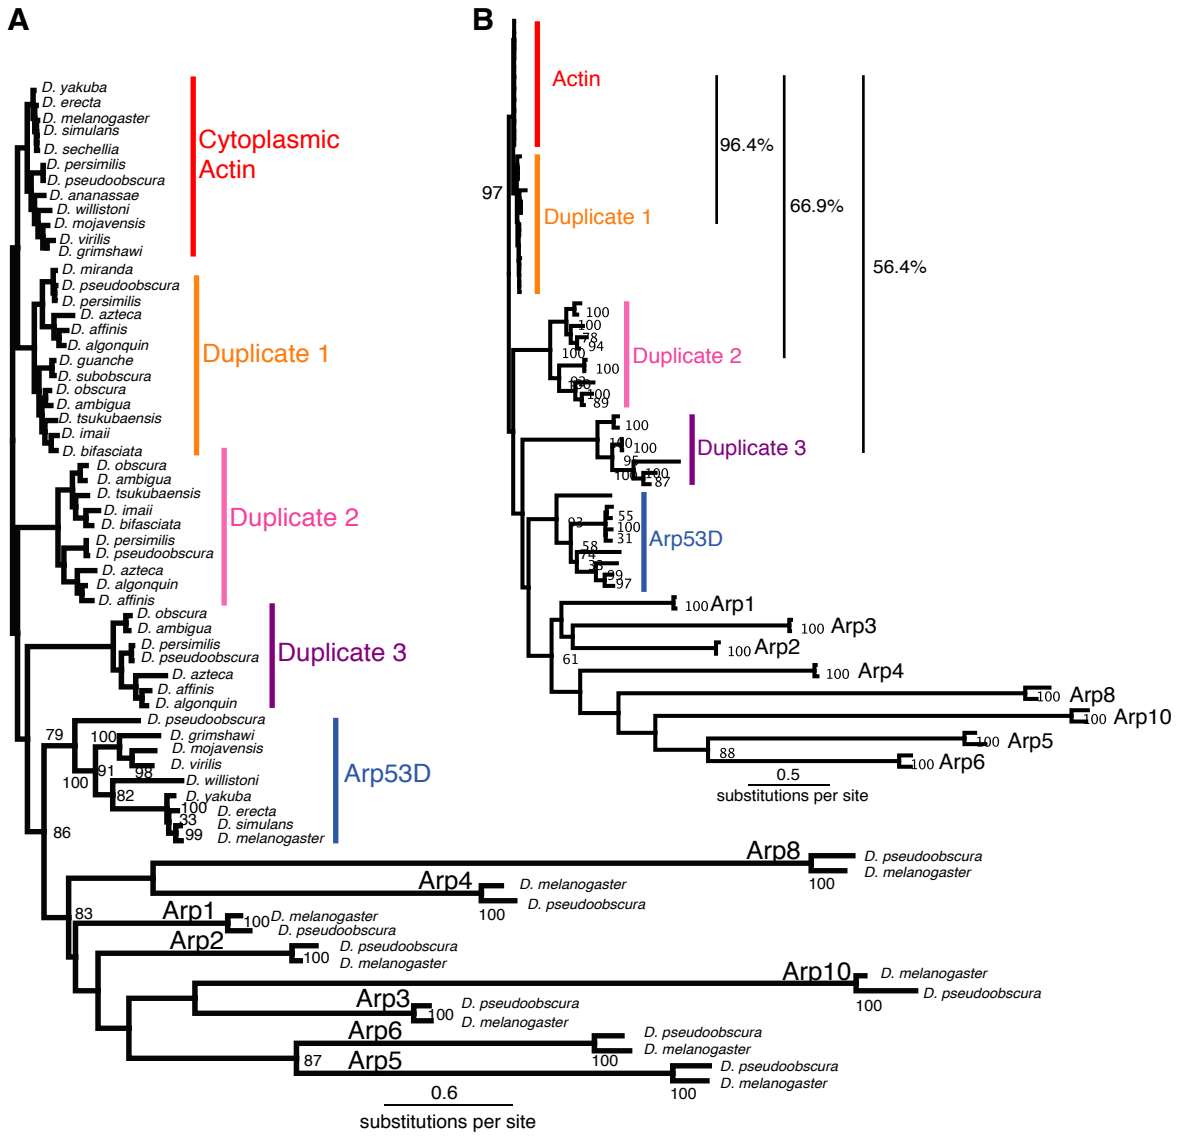

**Supplemental Figure S7: RT-PCR indicates male-enriched expression of Arp duplicates**

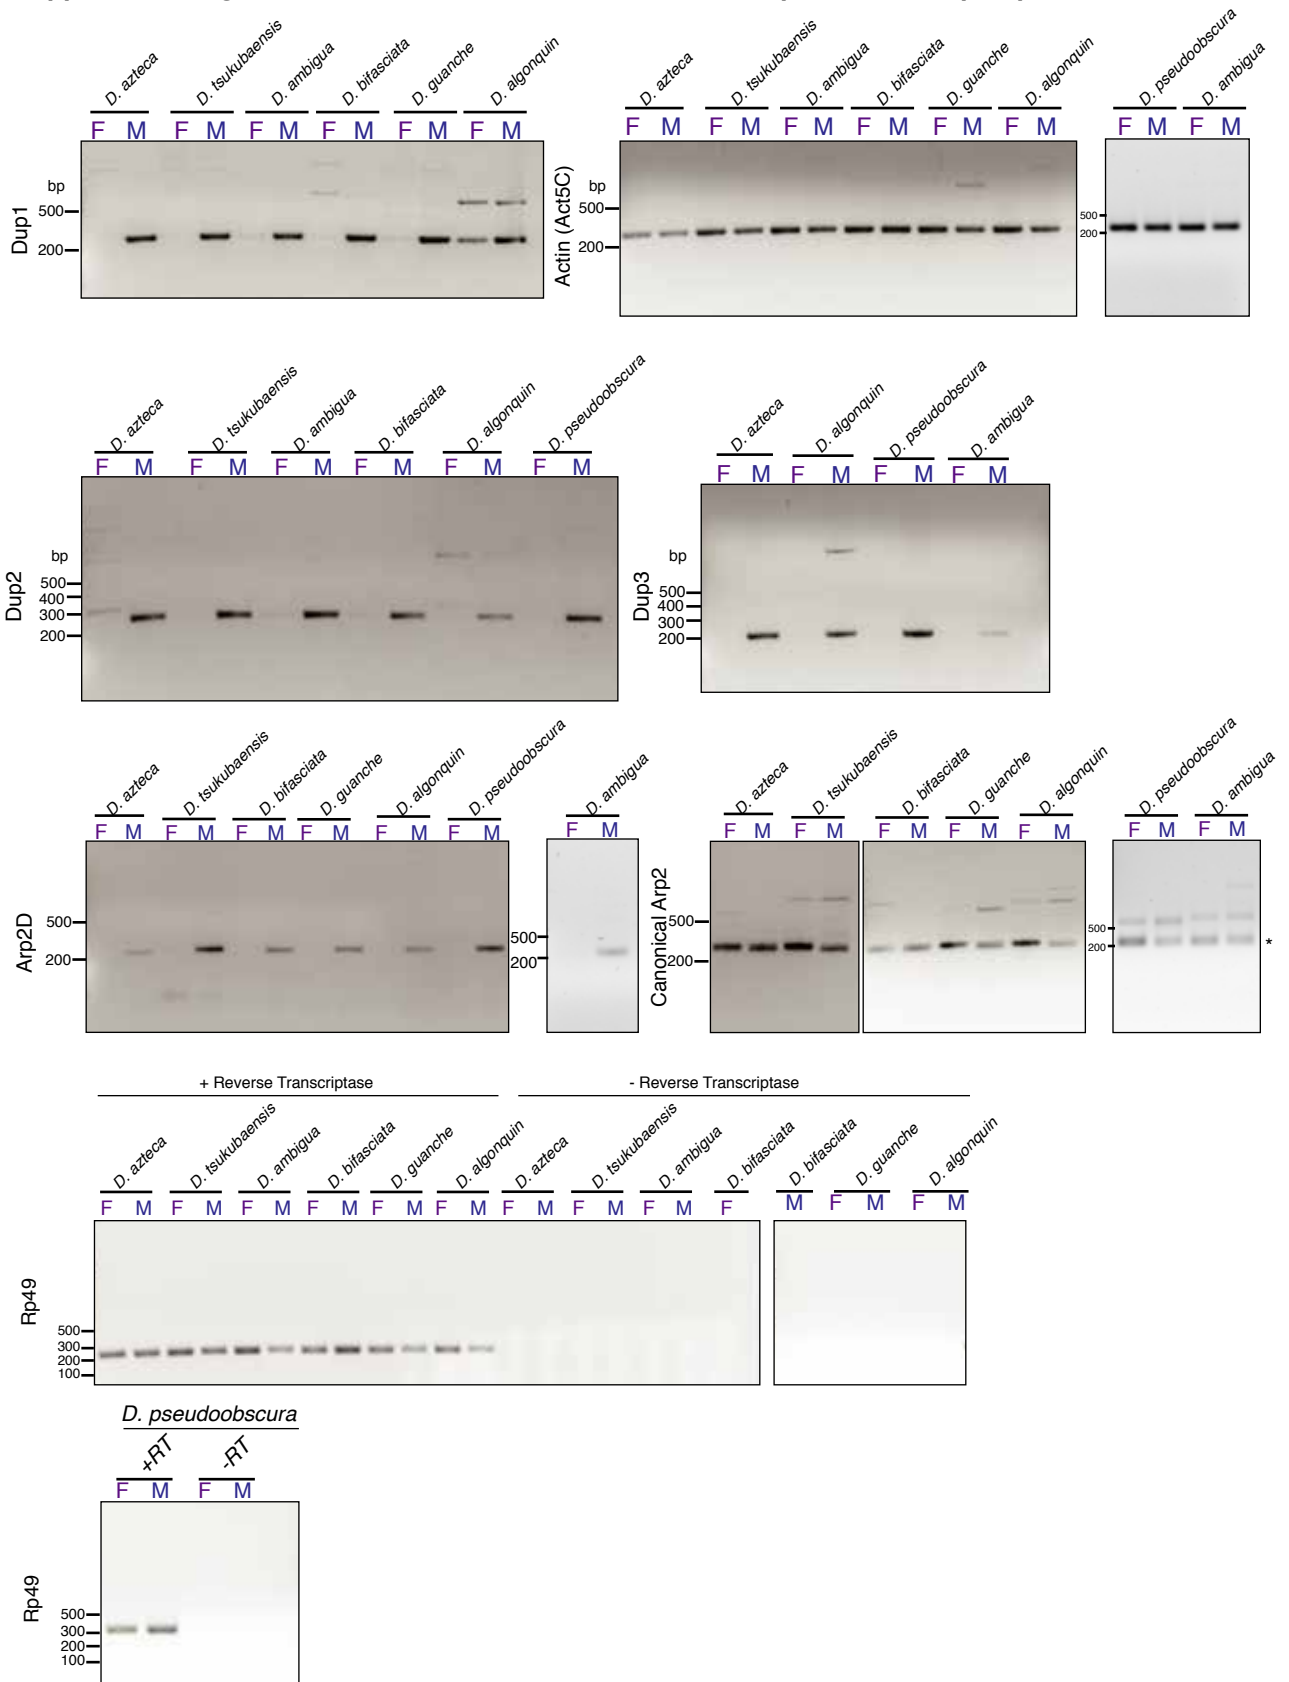

**Supplemental Figure S8: The ATP-binding motifs are conserved in the *D. pseudoobscura* Arp duplicates**

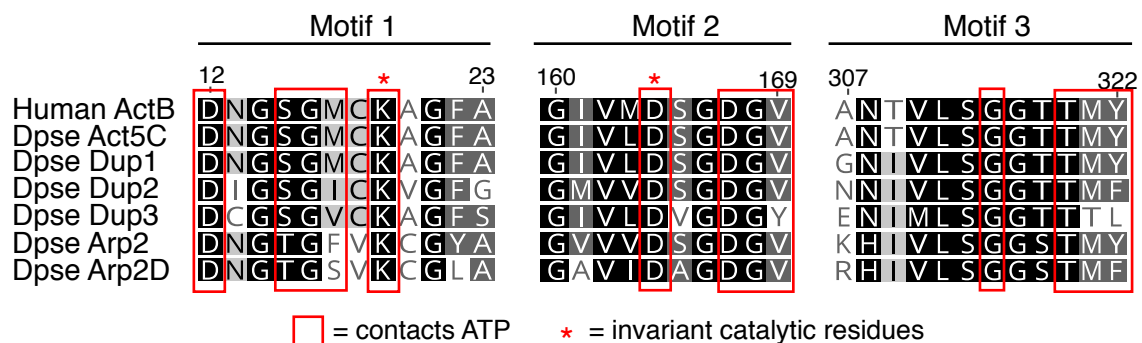



**Supplemental Figure S9: Arp2D/3 exhibits a stable complex similar to Arp2/3 despite fixed residue changes**

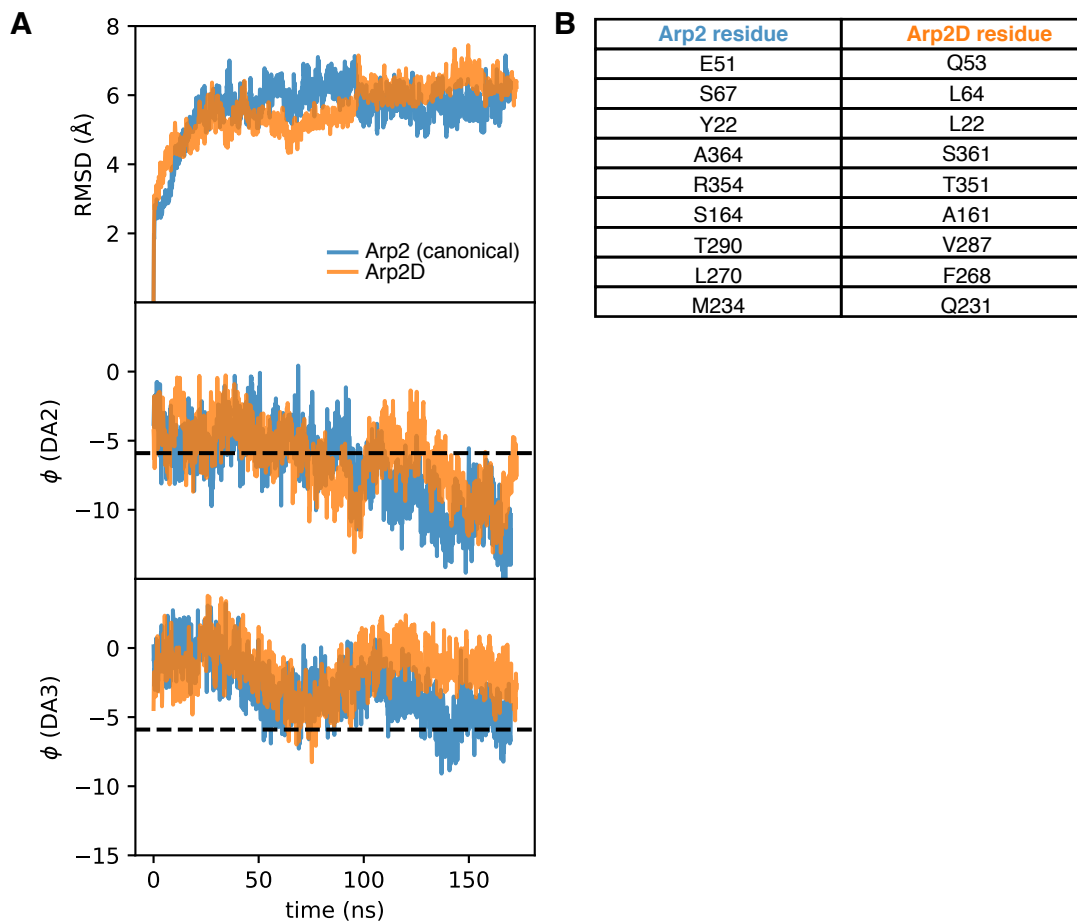

Supplemental Figure S10: Full-length Arp2D-sfGFP protein is expressed in the testis.

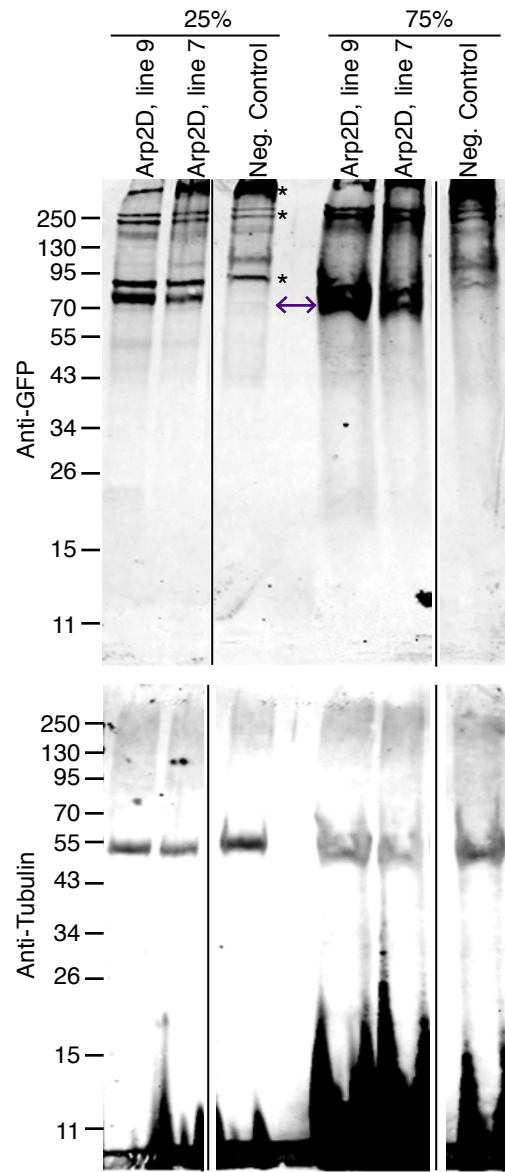

Supplemental Figure S11: *D. pseudoobscura* w- mature sperm exhibit autofluorescence but none in meiotic and post-meiotic cysts

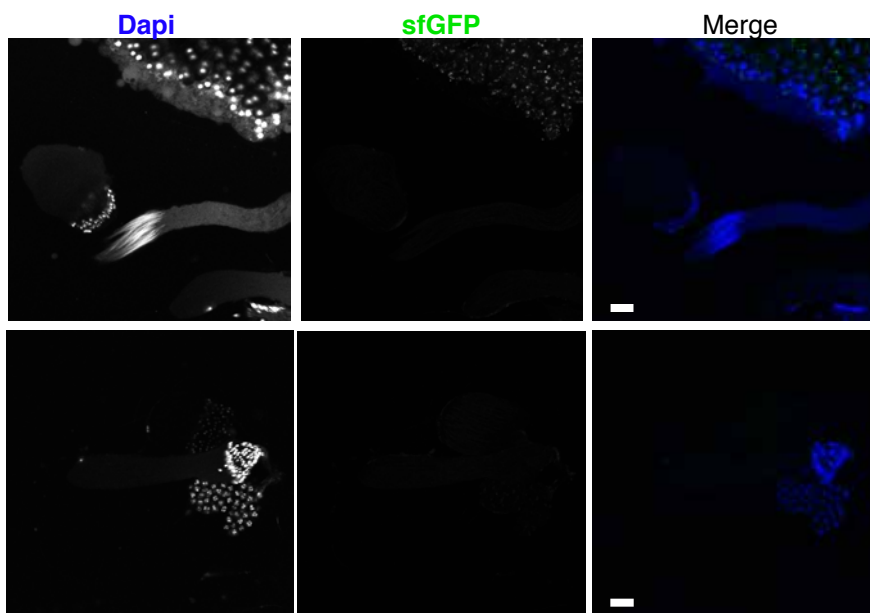

**Supplemental Figure S12: Arp2D localizes only to motile fan-like actin cones**

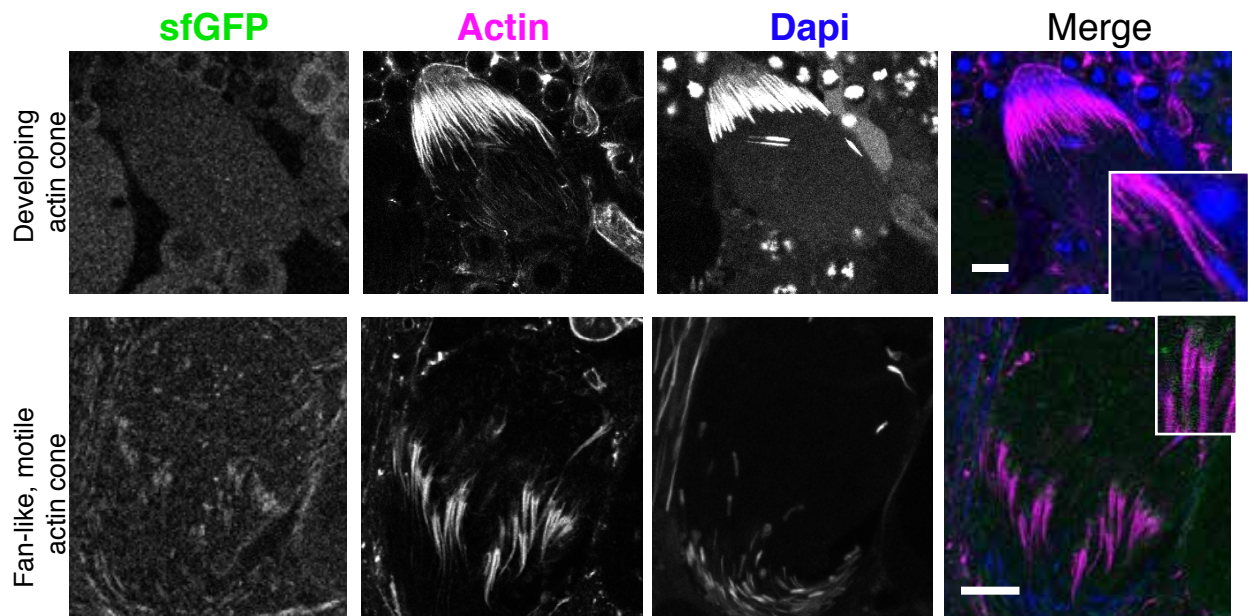

Supplement: Supplementary file [file media-5.pdf]
